# Supplementary material for: Molecular Genetics of Thrombotic Myeloproliferative Neoplasms: Implications in Precision Oncology
Source: MDPI journal article supplement (doi:10.3390/diagnostics13010163), 2023-01-03
Supplement: s1 [file s1]

**Table S1.** Thrombotic MPN patients with different gene mutations and gene polymorphisms.

| Type of patients       | Total number of patients | Number of thrombotic patients (%) | References |
|------------------------|--------------------------|-----------------------------------|------------|
| <b>Tyrosine kinase</b> |                          |                                   |            |
| <i>JAK2 V617F</i>      |                          |                                   |            |
| PV                     | 40                       | 14 (35.0)                         | [1]        |
|                        | 16                       | 3 (18.8)                          | [2]        |
|                        | 35                       | 8 (22.9)                          | [3]        |
|                        | 215                      | 28 (13.0)                         | [4]        |
|                        | 53                       | 18 (34.0)                         | [5]        |
|                        | 35                       | 15 (42.9)                         | [6]        |
|                        | 69                       | 14 (20.3)                         | [7]        |
|                        | 31                       | 11 (35.5)                         | [8]        |
|                        | 323                      | 110 (34.1)                        | [9]        |
| ET                     | 30                       | 14 (46.7)                         | [1]        |
|                        | 31                       | 13 (41.9)                         | [2]        |
|                        | 77                       | 35 (45.5)                         | [3]        |
|                        | 153                      | 27 (17.6)                         | [4]        |
|                        | 55                       | 17 (30.9)                         | [5]        |
|                        | 60                       | 28 (46.7)                         | [10]       |
|                        | 22                       | 7 (31.8)                          | [6]        |
|                        | 466                      | 33 (7.1)                          | [11]       |
|                        | 369                      | 111 (30.1)                        | [12]       |
|                        | 21                       | 3 (14.3)                          | [13]       |
|                        | 35                       | 4 (11.4)                          | [14]       |
|                        | 567                      | 48 (8.5)                          | [15]       |
|                        | 179                      | 39 (21.8)                         | [7]        |
|                        | 35                       | 10 (28.6)                         | [8]        |
|                        | 382                      | 138 (36.1)                        | [9]        |
| PMF                    | 4                        | 0 (0.0)                           | [2]        |
|                        | 54                       | 9 (16.7)                          | [4]        |
|                        | 7                        | 0 (0.0)                           | [5]        |
|                        | 16                       | 5 (31.3)                          | [6]        |
|                        | 6                        | 0 (0.0)                           | [16]       |
|                        | 6                        | 0 (0.0)                           | [8]        |
| MPN                    | 32                       | 20 (62.5)                         | [17]       |
|                        | 59                       | 18 (30.5)                         | [18]       |
|                        | 273                      | 84 (30.8)                         | [19]       |
|                        | 126                      | 39 (31.0)                         | [20]       |
|                        | 200                      | 169 (84.5)                        | [21]       |
|                        | 119                      | 45 (37.8)                         | [22]       |
|                        | 44                       | 23 (52.3)                         | [23]       |
|                        | 123                      | 58 (47.2)                         | [24]       |
|                        | 209                      | 84 (40.2)                         | [25]       |
| PV or ET               | 44                       | 38 (86.4)                         | [26]       |
|                        | 36                       | 9 (25.0)                          | [27]       |
|                        | 74                       | 34 (45.9)                         | [28]       |

|                                      |     |           |      |
|--------------------------------------|-----|-----------|------|
| <b>JAK2 exon12</b>                   |     |           |      |
| PV                                   | 4   | 1 (25.0)  | [7]  |
| <b>Receptors</b>                     |     |           |      |
| <b>MPL</b>                           |     |           |      |
| ET                                   | 25  | 10 (40.0) | [12] |
| PMF                                  | 2   | 0 (0.0)   | [29] |
| ET or PMF                            | 32  | 11 (34.4) | [30] |
| <b>CALR</b>                          |     |           |      |
| ET                                   | 85  | 6 (7.1)   | [4]  |
|                                      | 176 | 5 (2.8)   | [11] |
|                                      | 89  | 12 (13.5) | [12] |
|                                      | 23  | 5 (21.7)  | [13] |
|                                      | 10  | 0 (0.0)   | [16] |
|                                      | 208 | 7 (3.4)   | [15] |
|                                      | 47  | 3 (6.4)   | [7]  |
| PMF                                  | 21  | 1 (4.8)   | [4]  |
|                                      | 3   | 0 (0.0)   | [16] |
| MPN                                  | 91  | 9 (9.9)   | [31] |
| <b>FAS AA</b>                        |     |           |      |
| MPN                                  | 32  | 10 (31.3) | [32] |
| <b>FAS AG + GG</b>                   |     |           |      |
| MPN                                  | 69  | 16 (23.2) | [32] |
| <b>TLR4 D299G</b>                    |     |           |      |
| MPN                                  | 18  | 4 (22.2)  | [22] |
| <b>TLR4 T399I</b>                    |     |           |      |
| MPN                                  | 18  | 6 (33.3)  | [22] |
| <b>DNA methylation</b>               |     |           |      |
| <b>TET2</b>                          |     |           |      |
| PV                                   | 4   | 0 (0.0)   | [33] |
|                                      | 14  | 2 (14.3)  | [34] |
|                                      | 20  | 13 (65.0) | [35] |
| ET                                   | 6   | 3 (50.0)  | [33] |
|                                      | 3   | 3 (100.0) | [34] |
|                                      | 1   | 1 (100.0) | [36] |
| PMF                                  | 2   | 1 (50.0)  | [33] |
|                                      | 0   | 10 (0.0)  | [34] |
|                                      | 2   | 2 (100.0) | [36] |
| <b>Histone methylation</b>           |     |           |      |
| <b>ASXL1</b>                         |     |           |      |
| ET                                   | 14  | 6 (42.9)  | [13] |
| <b>DNMT3A + TET2 + ASXL1 (DTA)</b>   |     |           |      |
| PV                                   | 29  | 19 (65.5) | [35] |
| <b>Thrombophilic genetic factors</b> |     |           |      |
| <b>F5</b>                            |     |           |      |
| MPN                                  | 11  | 2 (18.2)  | [22] |
|                                      | 20  | 5 (25.0)  | [37] |

|                               |    |           |      |
|-------------------------------|----|-----------|------|
| PV or ET                      | 14 | 5 (35.7)  | [38] |
| <b>F2</b>                     |    |           |      |
| MPN                           | 15 | 6 (40.0)  | [22] |
|                               | 7  | 1 (14.3)  | [37] |
| <b>GPIIIa PI<sup>A1</sup></b> |    |           |      |
| PV                            | 32 | 6 (18.8)  | [39] |
| <b>GPIIIa PI<sup>A2</sup></b> |    |           |      |
| PV                            | 11 | 6 (54.5)  | [39] |
| <b>MTHFR</b>                  |    |           |      |
| MPN                           | 96 | 32 (33.3) | [22] |
| <b>DNA repair</b>             |    |           |      |
| <b>XRCC1</b>                  |    |           |      |
| MPN                           | 78 | 22 (28.2) | [40] |
| <b>Chemokine</b>              |    |           |      |
| <b>SDF-1 AA</b>               |    |           |      |
| PV or ET                      | 10 | 7 (70.0)  | [41] |
| <b>SDF-1 AG + GG</b>          |    |           |      |
| PV or ET                      | 63 | 21 (33.3) | [41] |

Abbreviations: *ASXL1*: Additional Sex Combs Like 1, *CALR*: Calreticulin, ET: Essential thrombocythaemia, *F2*: Factor II, *F5*: Factor 5, *GPIIIa PI<sup>A1</sup>*: Glycoprotein IIIa *PI<sup>A1</sup>* allele, *GPIIIa PI<sup>A2</sup>*: Glycoprotein IIIa *PI<sup>A2</sup>* allele, *JAK2*: Janus kinase 2, PMF: Primary myelofibrosis, *MPL*: Myeloproliferative leukaemia virus oncogene, MPN: Myeloproliferative neoplasms, *MTHFR*: Methylene tetrahydrofolate reductase, PV: Polycythaemia vera, *SDF-1*: Stromal cell-derived factor-1, *TET2*: Ten-eleven translocation 2, *TLR4*: Toll-like receptor 4, *XRCC1*: X-ray repair cross complementing 1.

**Table S2.** Summary of *JAK2*, *CALR*, *MPL*, *TET2*, *ASXL1* and gene mutation and polymorphisms in thrombotic MPN patients.

| MUTATIONS         |                                                                                                                                                                                                      |         |            |
|-------------------|------------------------------------------------------------------------------------------------------------------------------------------------------------------------------------------------------|---------|------------|
| Genes             | Descriptions                                                                                                                                                                                         | P value | References |
| <i>JAK2</i> V617F | <i>JAK2</i> V617F is associated to thrombosis in PV and ET.                                                                                                                                          | 0.02    | [1]        |
|                   | Increase the thrombotic risk in MPN.                                                                                                                                                                 | 0.04    | [17]       |
|                   | Thrombosis is more common in MPN patients with the mutation. Allele burden increases progressively with age.                                                                                         | 0.006   | [42]       |
|                   | Higher incidence of thrombosis in MPN patients with the mutation.                                                                                                                                    | 0.047   | [2]        |
|                   | <i>JAK2</i> mutation and additional thrombophilic markers predispose MPN patients with thrombocythaemia to thrombosis.                                                                               | 0.017   | [43]       |
|                   | <i>JAK2</i> is an independent risk factor for thrombosis.                                                                                                                                            | -       | [44]       |
|                   | ET and PMF with <i>JAK2</i> mutation are more susceptible to thrombosis.                                                                                                                             | <0.01   | [19]       |
|                   | <i>JAK2</i> mutated ET patients showed more frequent thrombotic events.                                                                                                                              | 0.004   | [45]       |
|                   | No significant difference was found between BCS and PVT and <i>JAK2</i> V617F.                                                                                                                       | 0.989   | [46]       |
|                   | Higher prevalence of <i>JAK2</i> V617F mutation in non-cirrhotic and non-malignant PVT patients.                                                                                                     | <0.001  | [47]       |
|                   | Weak association with thrombosis, particularly VTE present in sites other than the splanchnic region.                                                                                                | -       | [48]       |
|                   | Low incidence of <i>JAK2</i> V617F in SVT.                                                                                                                                                           | -       | [49]       |
|                   | No significant different between ET patients with or without mutation.                                                                                                                               | 0.57    | [50]       |
|                   | Patients with 12.6-30% and 78-100% <i>JAK2</i> V617F allele burden have higher rate of arterial thrombosis. Allele burden can predict the site of thrombosis but had no effect on thrombosis timing. | 0.001   | [28]       |
|                   | Patients with <i>JAK2</i> V617F allele burden >20% had 7.4-fold increased VTE risk.                                                                                                                  | 0.004   | [20]       |
|                   | Risk of VTE increased as <i>JAK2</i> V617F allele burden is higher.                                                                                                                                  | <0.05   |            |
|                   | The allele burden of <i>JAK2</i> V617F correlate to thrombotic events in ET.                                                                                                                         | 0.01    | [51]       |
|                   | Related to the thrombotic events before or during diagnosis.                                                                                                                                         | <0.03   | [10]       |
|                   | More frequent thrombosis in those with homozygous <i>JAK2</i> V617F.                                                                                                                                 | 0.003   | [21]       |
|                   | PV patients with >75% <i>JAK2</i> V617F allele burden displayed higher thrombotic risk compared to <25%.                                                                                             | 0.003   | [52]       |
|                   | Increase arterial thrombosis in <i>JAK2</i> mutated ET, but no association between the allele burden and thrombosis.                                                                                 | 0.001   | [53]       |
|                   | Equal number of thrombosis was observed in <i>JAK2</i>                                                                                                                                               | -       | [5]        |

|                                   |                                                                                                                     |        |      |
|-----------------------------------|---------------------------------------------------------------------------------------------------------------------|--------|------|
|                                   | positive and negative groups.                                                                                       |        |      |
|                                   | Thrombotic risk was not affected by <i>JAK2</i> mutation.                                                           | 0.22   | [18] |
|                                   | Occurred more often in patients with <i>JAK2</i> V67F mutation but was statistically insignificant.                 | 0.18   | [27] |
| <i>JAK2</i> exon 12               | Similar thrombotic risk as in <i>JAK2</i> V617F mutated PV patients.                                                | 0.4    | [54] |
| <i>CALR</i>                       | Less frequent venous thrombosis in ET with <i>CALR</i> mutation compared to <i>JAK2</i> mutation.                   | 0.03   | [4]  |
|                                   | Lower risk to develop thrombosis in ET and PV with <i>CALR</i> mutation compared to <i>JAK2</i> mutation.           | 0.001  | [11] |
|                                   | ET has lower risk to develop thrombotic events.                                                                     | 0.01   | [12] |
| <i>MPL</i>                        | No obvious differences in the frequency of thrombosis compared to other mutations. Exhibit micro vascular symptoms. | >0.05  | [12] |
|                                   | No correlation was established between <i>MPL</i> mutations and thrombosis.                                         | >0.05  | [30] |
|                                   | No vascular complications observed in PMF patients with mutation.                                                   | -      | [29] |
| <i>TET2</i>                       | Not related to the occurrence of thrombotic events in all subtypes of MPN.                                          | 0.422  | [33] |
|                                   | Significantly accompanied by the development of thrombosis in PV                                                    | 0.03   | [35] |
| <i>ASXL1</i>                      | Exhibit higher probability to develop thrombosis. A risk factor for vascular complications in ET.                   | 0.021  | [13] |
|                                   | Leukocytosis, shorter overall survival in PMF.                                                                      | <0.001 | [55] |
| <b>POLYMORPHISMS</b>              |                                                                                                                     |        |      |
| <i>GPIIIa</i> PIA2 allele         | Higher chance to develop arterial thrombosis in PV patients with homozygous or heterozygous PIA2 polymorphism.      | <0.05  | [39] |
| HPA-1a/1b variant                 | No correlation was found with thrombotic events.                                                                    | -      | [56] |
| <i>GPIIb/IIIa</i> c.807C>T        | Higher prevalence of TT genotype in MPN patients with arterial thrombosis.                                          | 0.049  | [57] |
| <i>XRCC1</i> Gln399Arg            | Associated with thrombotic and bleeding complications in MPN patients.                                              | 0.386  | [40] |
|                                   | CT genotype was detected more higher in MPN patients with thrombotic events compared to homozygous and wild type.   | 0.02   | [57] |
| <i>F2</i> (Prothrombin's G20210A) | Not related to thrombosis in PV and ET.                                                                             | -      |      |
|                                   | No relationship observed between <i>F2</i> and thrombosis in MPN.                                                   | >0.05  | [37] |
| <i>F5</i> (Leiden)                | Not related to thrombosis in PV and ET.                                                                             | -      | [57] |

|                                  |                                                                                                                                                 |        |      |
|----------------------------------|-------------------------------------------------------------------------------------------------------------------------------------------------|--------|------|
| mutation)                        | No relationship observed between <i>F5</i> and thrombosis in MPN.                                                                               | >0.05  | [37] |
|                                  | Higher rate of detection of venous thrombosis before and at time of diagnosis and recurrence of venous thrombosis, but not arterial thrombosis. | 0.03   | [38] |
|                                  | Increase the risk of thrombosis in MPN patients.                                                                                                | 0.03   | [58] |
|                                  | Strong association with increased thrombotic risk.                                                                                              | 0.019  | [48] |
| <i>F7</i>                        | Independent risk factor in thrombotic development of overall MPN.                                                                               | 0.0007 | [59] |
| <i>F7</i> (c.-323P0/10)          | More frequently present in thrombotic MPN patients.                                                                                             | 0.04   | [57] |
| <i>F12</i> -46C/T                | Not correlate to thrombotic complication in PV and ET.                                                                                          | -      | [56] |
| <i>MMP9</i>                      | Might be a contributing factor for the occurrence of vascular events in MPN patients, especially in ET group.                                   | 0.002  | [60] |
| <i>HPA5</i>                      | <i>HPA5 b</i> allele has a protective role for vascular events in MPN patients.                                                                 | 0.03   | [61] |
| <i>MTHFR</i> -C667T              | Could have a role as a prothrombotic factor and causing thrombosis in MPN patients.                                                             | <0.05  | [62] |
| <i>SDF-1</i>                     | Homozygous AA PV and ET patients tend to have thrombosis. AA genotype can be as a predictor for thrombotic events in PV and ET patients.        | 0.03   | [41] |
| <i>FAS</i> 670A>G                | No association to venous thrombosis.                                                                                                            | 0.41   | [32] |
| <i>FASL</i> 843C>T               | No statistically significant correlation between the polymorphism and venous thrombosis.                                                        | >0.05  |      |
| <i>TERT</i>                      | Not related to thrombosis.                                                                                                                      | -      | [63] |
| <i>ACE I</i> and <i>D</i> allele | Both showed no associated to thrombotic events.                                                                                                 | >0.05  | [64] |
| <i>TLR4</i> -D299G               | Irrelevant to thrombotic risk. Seems to exhibit a protective role in thrombotic effect.                                                         | 0.43   | [22] |
| <i>TLR4</i> -T399I               | Irrelevant to thrombotic risk.                                                                                                                  | 0.99   |      |

Abbreviations: *ASXL1*: Additional Sex Combs Like 1, *CALR*: Calreticulin, ET: Essential thrombocythaemia, *F2*: Factor II, *F5*: Factor 5, *GPIIIa* *PI*<sup>A1</sup>: Glycoprotein IIIa *PI*<sup>A1</sup> allele, *GPIIIa* *PI*<sup>A2</sup>: Glycoprotein IIIa *PI*<sup>A2</sup> allele, *JAK2*: Janus kinase 2, PMF: Primary myelofibrosis, *MPL*: Myeloproliferative leukaemia virus oncogene, MPN: Myeloproliferative neoplasms, *MTHFR*: Methylenetetrahydrofolate reductase, PV: Polycythaemia vera, *SDF-1*: Stromal cell-derived factor-1, *TET2*: Ten-eleven translocation 2, *TLR4*: Toll-like receptor 4, *XRCC1*: X-ray repair cross complementing 1.

## References

1. Basquiera, A.L.; Soria, N.W.; Ryser, R.; Salguero, M.; Moiraghi, B.; Sackmann, F.; Sturich, A.G.; Borello, A.; Berretta, A.; Bonafé, M. Clinical significance of V617F mutation of the JAK2 gene in patients with chronic myeloproliferative disorders. *Hematology* **2009**, *14*, 323-330.
2. Takata, Y.; Seki, R.; Kanajiri, T.; Nohara, M.; Koteda, S.; Kawaguchi, K.; Nomura, K.; Nakamura, T.; Morishige, S.; Oku, E. Association between Thromboembolic Events and the JAK2 V617F Mutation in Myeloproliferative Neoplasms Cancer. *Kurume Med. J.* **2014**, *60*, 89-97.
3. Speletas, M.; Katodritou, E.; Daiou, C.; Mandala, E.; Papadakis, E.; Kioumi, A.; Ritis, K.; Korantzis, I. Correlations of JAK2-V617F mutation with clinical and laboratory findings in patients with myeloproliferative disorders. *Leuk. Res.* **2007**, *31*, 1053-1062.

4. Andrikovics, H.; Krahling, T.; Balassa, K.; Halm, G.; Bors, A.; Koszarska, M.; Batai, A.; Dolgos, J.; Csomor, J.; Egyed, M. Distinct clinical characteristics of myeloproliferative neoplasms with calreticulin mutations. *Haematologica* **2014**, *99*, 1184-1190.
5. Iványi, J.L.; Marton, E.; Plander, M. Significance of the JAK2V617F mutation in patients with chronic myeloproliferative neoplasia. *Orv. Hetil.* **2011**, *152*, 1795-1803.
6. Mattar, M.M.; Nassef, S.; El Husseiny, N.M.; El Masry, M.R.; Salah, M.; Morad, M.A.; Gawad, A.A. Incidence of Silent Thrombosis in Patients Younger Than 60 Years With Myeloproliferative Neoplasms: Single-Center Egyptian Study. *Clin. Lymphoma Myeloma Leuk.* **2019**, *19*, 425-429.
7. Okabe, M.; Yamaguchi, H.; Usuki, K.; Kobayashi, Y.; Kawata, E.; Kuroda, J.; Kimura, S.; Tajika, K.; Gomi, S.; Arima, N., et al. Clinical features of Japanese polycythemia vera and essential thrombocythemia patients harboring CALR, JAK2V617F, JAK2Ex12del, and MPLW515L/K mutations. *Leuk. Res.* **2016**, *40*, 68-76.
8. Marton, S.; Ivanyi, L.; Kereskai, L.; Pajor, L. Incidence of jak2 v617f tyrosine kinase mutation and its correlation with thrombosis and bleeding complications in patients with chronic myeloproliferative disorders. *Haematologica* **2008**, *93*, 524-524.
9. Vannucchi, A.M.; Antonioli, E.; Guglielmelli, P.; Rambaldi, A.; Barosi, G.; Marchioli, R.; Marfisi, R.M.; Finazzi, G.; Guerini, V.; Fabris, F. Clinical profile of homozygous JAK2 617V> F mutation in patients with polycythemia vera or essential thrombocythemia. *Blood* **2007**, *110*, 840-846.
10. Patriarca, A.; Pompetti, F.; Malizia, R.; Iuliani, O.; Di Marzio, I.; Spadano, A.; Dragani, A. Is the absence of JAK2V617F mutation a risk factor for bleeding in essential thrombocythemia? An analysis of 106 patients. *Blood Transfus.* **2010**, *8*, 21-27.
11. Rumi, E.; Pietra, D.; Ferretti, V.; Klampfl, T.; Harutyunyan, A.S.; Milosevic, J.D.; Them, N.C.; Berg, T.; Elena, C.; Casetti, I.C. JAK2 or CALR mutation status defines subtypes of essential thrombocythemia with substantially different clinical course and outcomes. *Blood* **2014**, *123*, 1544-1551.
12. Rotunno, G.; Mannarelli, C.; Guglielmelli, P.; Pacilli, A.; Pancrazzi, A.; Pieri, L.; Fanelli, T.; Bosi, A.; Vannucchi, A.M. Impact of calreticulin mutations on clinical and hematological phenotype and outcome in essential thrombocythemia. *Blood* **2014**, *123*, 1552-1555.
13. Nie, Y.B.; Sun, M.; He, C.K.; Ju, M.K.; Zhou, F.L.; Wu, S.Y.; Zhou, Y.; Liu, L.; Shen, H.; Huang, T.T. ASXL1 mutations in Chinese patients with essential thrombocythemia. *Exp. Ther. Med.* **2018**, *15*, 4149-4156.
14. Tognon, R.; de Souza Nunes, N.; de Castro, F.A. Apoptosis deregulation in myeloproliferative neoplasms. *Einstein* **2013**, *11*, 540-544.
15. Pietra, D.; Rumi, E.; Ferretti, V.; Di Buduo, C.; Milanese, C.; Cavalloni, C.; Sant'Antonio, E.; Abbonante, V.; Moccia, F.; Casetti, I. Differential clinical effects of different mutation subtypes in CALR-mutant myeloproliferative neoplasms. *Leukemia* **2016**, *30*, 431-438.
16. Tang, Q.; Zhang, X.; Xia, L.; Jiang, N. Mutation of CALR Gene in Patients with Chronic Myeloproliferative Neoplasm and Its Clinical Significance. *Chin. J. Exp. Trad. Med. Form.* **2017**, *25*, 151-156.
17. Singh, K.; Sazawal, S.; Chhikara, S.; Mahapatra, M.; Saxena, R. Association of JAK2V617F mutation with thrombosis in Indian patients with Philadelphia negative chronic myeloproliferative neoplasms. *Indian J. Pathol. Microbiol.* **2018**, *61*, 371-374.
18. Lieu, C.H.; Wu, H.S.; Hon, Y.C.; Tsai, W.H.; Yang, C.F.; Wang, C.C.; Lin, Y.C.; Shih, C.H.; Hsu, H.C. Prevalence of the JAK2-V617F mutation in Taiwanese patients with chronic myeloproliferative disorders. *Intern. Med. J.* **2008**, *38*, 422-426.
19. Guo, X.; Yang, L.; Yan, K.; Yang, R.; Lin, J. Relationship between JAK2-V617F Gene Mutation in Peripheral Blood Mononuclear Cells and Thrombotic Events in Patients with Myeloproliferative Neoplasms. *J. Mod. Lab. Med.* **2017**, *32*, 143-145.
20. Borowczyk, M.; Wojtaszewska, M.; Lewandowski, K.; Gil, L.; Lewandowska, M.; Lehmann-Kopydłowska, A.; Kroll-Balcerzak, R.; Balcerzak, A.; Iwola, M.; Michalak, M., et al. The JAK2 V617F mutational status and allele burden may be related with the risk of venous thromboembolic events in patients with Philadelphia-negative myeloproliferative neoplasms. *Thromb. Res.* **2015**, *135*, 272-280.
21. Bang, S.-M.; Lee, J.-S.; Ahn, J.Y.; Lee, J.H.; Hyun, M.S.; Kim, B.S.; Park, M.R.; Chi, H.-S.; Kim, H.Y.; Kim, H.J. Vascular events in Korean patients with myeloproliferative neoplasms and their relationship to JAK2 mutation. *Thromb. Haemostasis* **2009**, *101*, 547-551.
22. Speletas, M.; Liadaki, K.; Kalala, F.; Daiou, C.; Katodritou, E.; Mandala, E.; Korantzis, I.; Ritis, K.; Zintzaras, E.; Germeris, A. TLR4 single nucleotide polymorphisms and thrombosis risk in patients with myeloproliferative disorders. *Thromb. Res.* **2008**, *122*, 27-32.
23. Li, Z.; Fu, H.; Wang, Z.; Yang, S.; Xu, H. Correlative study between the JAK2V617F mutation and thrombosis in patients with myeloproliferative neoplasm. *Genet. Mol. Res.* **2016**, *15*, 1-7.
24. Tevet, M.; Ionescu, R.; Dragan, C.; LUPU, A.R. Influence of the JAK2 V617F mutation and inherited thrombophilia on the thrombotic risk among patients with myeloproliferative disorders. *Maedica* **2015**, *10*, 27-32.
25. Giamouris, V.; Befani, M.; Papadakis, E.; Mandala, E.; Papadoulis, N.; Karamagiolis, S.; Gastari, V.; Verrou, E.; Katodritou, E.; Lafioniatis, S. Influence of common thrombophilia polymorphisms on the thrombosis risk in patients with JAK2-V617F-positive myeloproliferative neoplasms. *Thromb. Res.* **2012**, *130*, 117-118.
26. Kundranda, M.N.; Maiti, B.; Iqbal, N.; Muslimani, A.A.; Chaudhry, A.; Spiro, T.M.; Daw, H. The association of leukocytosis, thrombocytosis and JAK2V617F mutation with thrombotic events in myeloproliferative disorders (MPD's). *Blood* **2008**, *112*, 2803.
27. Hattori, N.; Fukuchi, K.; Nakashima, H.; Maeda, T.; Adachi, D.; Saito, B.; Yanagisawa, K.; Matsuda, I.; Nakamaki, T.; Gomi, K. Megakaryopoiesis and platelet function in polycythemia vera and essential thrombocythemia patients with JAK2 V617F mutation. *Int. J. Hematol.* **2008**, *88*, 181-188.

28. Uyanik, M.S.; Baysal, M.; Pamuk, G.E.; Maden, M.; Akker, M.; Umit, E.G.; Demir, M.; Aydogdu, E. Is JAK2V617F mutation the only factor for thrombosis in Philadelphia-negative chronic myeloproliferative neoplasms? *Indian J. Hematol. Blood Transfus.* **2016**, *32*, 262-267.
29. Akpınar, T.S.; Hançer, V.S.; Nalçacı, M.; Diz-Küçükaya, R. MPL W515L/K mutations in chronic myeloproliferative neoplasms. *Turk. J. Haematol.* **2013**, *30*, 8-12.
30. Beer, P.A.; Campbell, P.J.; Scott, L.M.; Bench, A.J.; Erber, W.N.; Bareford, D.; Wilkins, B.S.; Reilly, J.T.; Hasselbalch, H.C.; Bowman, R. MPL mutations in myeloproliferative disorders: analysis of the PT-1 cohort. *Blood* **2008**, *112*, 141-149.
31. Mózes, R.; Gángó, A.; Sulák, A.; Vida, L.; Reiniger, L.; Timár, B.; Krenács, T.; Alizadeh, H.; Masszi, T.; Gaál-Weisinger, J., et al. Calreticulin mutation specific CAL2 immunohistochemistry accurately identifies rare calreticulin mutations in myeloproliferative neoplasms. *Pathology* **2019**, *51*, 301-307.
32. Ozdemirkiran, F.G.; Nalbantoglu, S.; Gokgoz, Z.; Payzin, B.K.; Vural, F.; Cagiran, S.; Berdeli, A. FAS/FASL gene polymorphisms in Turkish patients with chronic myeloproliferative disorders. *Arch. Med. Sci.* **2017**, *13*, 426-432.
33. Ha, J.-S.; Jeon, D.-S.; Kim, J.-R.; Ryoo, N.-H.; Suh, J.-S. Analysis of the Ten-Eleven Translocation 2 (TET2) gene mutation in myeloproliferative neoplasms. *Ann. Clin. Lab. Sci.* **2014**, *44*, 173-179.
34. Tefferi, A.; Pardanani, A.; Lim, K.; Abdel-Wahab, O.; Lasho, T.; Patel, J.; Gangat, N.; Finke, C.; Schwager, S.; Mullally, A. TET2 mutations and their clinical correlates in polycythemia vera, essential thrombocythemia and myelofibrosis. *Leukemia* **2009**, *23*, 905-911.
35. Segura-Díaz, A.; Stuckey, R.; Florido, Y.; González-Martín, J.M.; López-Rodríguez, J.F.; Sánchez-Sosa, S.; González-Pérez, E.; Sáez Perdomo, M.N.; Perera, M.d.M.; de la Iglesia, S. Thrombotic Risk Detection in Patients with Polycythemia Vera: The Predictive Role of DNMT3A/TET2/ASXL1 Mutations. *Cancers* **2020**, *12*, 1-9.
36. Colaizzo, D.; Tiscia, G.; Pisanelli, D.; Bafunno, V.; Amitrano, L.; Grandone, E.; Guardascione, M.; Margaglione, M. New TET2 gene mutations in patients with myeloproliferative neoplasms and splanchic vein thrombosis. *J. Thromb. Haemost.* **2010**, *8*, 1142-1144.
37. Soyer, N.; Küçükarslan, A.S.; Sahin, F.; Çekdemir, D.; Kosova, B.; Eroglu, Z.; Töbü, M.; Tombuloglu, M.; Çagiran, S.; Dönmez, A. Factor V G1691A (Leiden) and prothrombin G20210A gene mutation status, and thrombosis in patients with chronic myeloproliferative disorders/Kronik myeloproliferatif hastalik tanili hastalarda Factor V 1691A (Leiden) ve protrombin G20210A gen mutasyonu ve tromboz. *Turk. J. Haematol.* **2011**, *28*, 306.
38. Ruggeri, M.; Gisslinger, H.; Tosi, A.; Rintelen, C.; Mannhalter, C.; Pabinger, I.; Heis, N.; Castaman, G.; Missiaglia, E.; Lechner, K. Factor V Leiden mutation carriership and venous thromboembolism in polycythemia vera and essential thrombocythemia. *Am. J. Hematol.* **2002**, *71*, 1-6.
39. Afshar-Kharghan, V.; López, J.A.; Gray, L.A.; Padilla, A.; Borthakur, G.; Roberts, S.C.; Pruthi, R.K.; Tefferi, A. Hemostatic gene polymorphisms and the prevalence of thrombotic complications in polycythemia vera and essential thrombocythemia. *Blood Coagul. Fibrinolysis* **2004**, *15*, 21-24.
40. Azevedo, A.P.; Silva, S.N.; Reichert, A.; Lima, F.; Júnior, E.; Rueff, J. Effects of polymorphic DNA genes involved in BER and caspase pathways on the clinical outcome of myeloproliferative neoplasms under treatment with hydroxyurea. *Mol. Med. Rep.* **2018**, *18*, 5243-5255.
41. Gerli, G.; Vanelli, C.; Turri, O.; Erario, M.; Gardellini, A.; Pugliano, M.; Biondi, M.L. SDF1-3' A gene polymorphism is associated with chronic myeloproliferative disease and thrombotic events. *Clin. Chem.* **2005**, *51*, 2411-2414.
42. Randi, M.L.; Ruzzon, E.; Tezza, F.; Scapin, M.; Duner, E.; Scandellari, R.; Fabris, F. JAK2V617F mutation is common in old patients with polycythemia vera and essential thrombocythemia. *Aging Clin. Exp. Res.* **2011**, *23*, 17-21.
43. Penka, M.; Schwarz, J.; Doubek, M.; Dulicek, P.; Indrak, K.; Brychtova, Y.; Hlusí, A.; Kissova, J.; Mayer, J.; Pavlik, T. JAK2 Mutation and Additional Thrombophilic Markers Predispose to Thrombosis in Myeloproliferative Diseases with Thrombocythemia. *Blood* **2008**, *112*, 5257.
44. Mahjoub, S.; Baccouche, H.; Sahnoun, M.; Kaabi, H.; Manai, Z.; Slama, H.; Ben, N.R. The JAK2 mutation in myeloproliferative disorders: A predictive factor of thrombosis. *Tunis. Med.* **2015**, *93*, 474-477.
45. Kang, M.-G.; Choi, H.-W.; Lee, J.H.; Choi, Y.J.; Choi, H.-J.; Shin, J.-H.; Suh, S.-P.; Szardenings, M.; Kim, H.-R.; Shin, M.-G. Coexistence of JAK2 and CALR mutations and their clinical implications in patients with essential thrombocythemia. *Oncotarget* **2016**, *7*, 57036-57049.
46. Kiladjian, J.-J.; Cervantes, F.; Leebeek, F.W.; Marzac, C.; Cassinat, B.; Chevret, S.; Cazals-Hatem, D.; Plessier, A.; Garcia-Pagan, J.-C.; Murad, S.D. The impact of JAK2 and MPL mutations on diagnosis and prognosis of splanchic vein thrombosis: a report on 241 cases. *Blood* **2008**, *111*, 4922-4929.
47. Qi, X.; Zhang, C.; Han, G.; Zhang, W.; He, C.; Yin, Z.; Liu, Z.; Bai, W.; Li, R.; Bai, M. Prevalence of the JAK2V617F mutation in Chinese patients with Budd-Chiari syndrome and portal vein thrombosis: a prospective study. *J. Gastroenterol. Hepatol.* **2012**, *27*, 1036-1043.
48. Singh, N.; Sharma, A.; Sazawal, S.; Ahuja, A.; Upadhyay, A.; Mahapatra, M.; Saxena, R. Prevalence of JAK2V617F mutation in deep venous thrombosis patients and its clinical significance as a thrombophilic risk factor: Indian perspective. *Clin. Appl. Thromb. Hemost.* **2015**, *21*, 579-583.
49. Yoo, E.H.; Jang, J.H.; Park, K.J.; Gwak, G.Y.; Kim, H.J.; Kim, S.H.; Kim, D.K. Prevalence of overt myeloproliferative neoplasms and JAK2 V617F mutation in Korean patients with splanchic vein thrombosis. *Int. J. Lab. Hematol.* **2011**, *33*, 471-476.
50. Wolanskyj, A.P.; Lasho, T.L.; Schwager, S.M.; McClure, R.F.; Wadleigh, M.; Lee, S.J.; Gary Gilliland, D.; Tefferi, A. JAK2V617F mutation in essential thrombocythemia: clinical associations and long-term prognostic relevance. *Br. J. Haematol.* **2005**, *131*, 208-213.



51. Ha, J.-S.; Kim, Y.-K.; Jung, S.-I.; Jung, H.-R.; Chung, I.-S. Correlations between Janus kinase 2 V617F allele burdens and clinicohematologic parameters in myeloproliferative neoplasms. *Ann. Lab. Med.* **2012**, *32*, 385-391.
52. Vannucchi, A.; Antonioli, E.; Guglielmelli, P.; Longo, G.; Pancrazzi, A.; Ponziani, V.; Bogani, C.; Ferrini, P.R.; Rambaldi, A.; Guerini, V. Prospective identification of high-risk polycythemia vera patients based on JAK2 V617F allele burden. *Leukemia* **2007**, *21*, 1952-1959.
53. Larsen, T.S.; Pallisgaard, N.; Møller, M.B.; Hasselbalch, H.C. High prevalence of arterial thrombosis in JAK2 mutated essential thrombocythaemia: independence of the V617F allele burden. *Hematology* **2008**, *13*, 71-76.
54. Passamonti, F.; Elena, C.; Schnittger, S.; Skoda, R.C.; Green, A.R.; Girodon, F.; Kiladjian, J.-J.; McMullin, M.F.; Ruggeri, M.; Besses, C. Molecular and clinical features of the myeloproliferative neoplasm associated with JAK2 exon 12 mutations. *Blood* **2011**, *117*, 2813-2816.
55. Vannucchi, A.; Lasho, T.; Guglielmelli, P.; Biamonte, F.; Pardanani, A.; Pereira, A.; Finke, C.; Score, J.; Gangat, N.; Mannarelli, C. Mutations and prognosis in primary myelofibrosis. *Leukemia* **2013**, *27*, 1861-1869.
56. Randi, M.L.; Lombardi, A.M.; Scapin, M.; Tezza, F.; Scandellari, R.; Ruzzon, E.; Duner, E.; Fabris, F. Haemostatic proteins gene polymorphisms in patients with unusual vein thrombosis and Ph-myeloproliferative disorders. *Thromb. Haemostasis* **2007**, *98*, 702-704.
57. Dambrauskienė, R.; Gerbutavičius, R.; Ugenskienė, R.; Jankauskaitė, R.; Savukaitytė, A.; Šimoliūnienė, R.; Rudžianskienė, M.; Gerbutavičienė, R.; Juozaitytė, E. Genetic polymorphisms of hemostatic factors and thrombotic risk in non BCR-ABL myeloproliferative neoplasms: A pilot study. *Balkan J. Med. Genet.* **2017**, *20*, 35-42.
58. Jensen, M.K.; de Nully Brown, P.; Thorsen, S.; Hasselbalch, H.C. Frequent occurrence of anticardiolipin antibodies, Factor V Leiden mutation, and perturbed endothelial function in chronic myeloproliferative disorders. *Am. J. Hematol.* **2002**, *69*, 185-191.
59. Buxhofer-Ausch, V.; Olcaydu, D.; Gisslinger, B.; Schalling, M.; Frantal, S.; Thiele, J.; Müllauer, L.; Kvasnicka, H.M.; Watzke, H.; Kralovics, R. Decanucleotide insertion polymorphism of F7 significantly influences the risk of thrombosis in patients with essential thrombocythemia. *Eur. J. Haematol.* **2014**, *93*, 103-111.
60. Maral, S.; Acar, M.; Balcik, O.S.; Uctepe, E.; Hatipoglu, O.F.; Akdeniz, D.; Altun, H.U.; Kosar, A.; Gunduz, M.; Gunduz, E. Matrix metalloproteinases 2 and 9 polymorphism in patients with myeloproliferative diseases: a STROBE-compliant observational study. *Medicine (Baltimore)* **2015**, *94*, 1-8.
61. Horvat, I.; Antolić, M.R.; Rončević, P.; Serventi-Seiwerth, R.; Zadro, R. Thrombosis in MPN patients and gene frequency of human platelet antigens. In Proceedings of MPN & MPNr-EuroNet Tenth Meeting "Biology of sporadic and Hereditary Myeloproliferative Disease", Zagreb, Croatia; pp. 50-50.
62. Papadakis, E.; Papageorgiou, V.; Tsepanis, K.; Theocharidou, D.; Papadopoulos, V.K.; Georgiou, E.; Efraimidou, S.; Kioumi, A. Impact of Inherited Thrombophilia Factors On Thrombotic Risk in Patients with Newly Diagnosed BCR-Abl (-) Myeloproliferative Disorders; Finally a Role of MTHFR-C677T Polymorphism? *Blood* **2012**, *120*, 5065.
63. Krahling, T.; Balassa, K.; Kiss, K.P.; Bors, A.; Batai, A.; Halm, G.; Egyed, M.; Fekete, S.; Remenyi, P.; Masszi, T. Co-occurrence of myeloproliferative neoplasms and solid tumors is attributed to a synergism between cytorreductive therapy and the common TERT polymorphism rs2736100. *Cancer Epidemiol. Biomarkers Prev.* **2016**, *25*, 98-104.
64. Gorukmez, O.; Sag, Ş.O.; Gorukmez, Ö.; Ture, M.; Topak, A.; Sahinturk, S.; Ozkaya, G.; Gulten, T.; Ali, R.; Yakut, T. Association of the ACE I/D gene polymorphisms with JAK2V617F-positive polycythemia vera and essential thrombocythemia. *Genet. Test. Mol. Biomarkers* **2015**, *19*, 303-308.
